# Supplementary figures and images for: RNA-dependent chromatin association of transcription elongation factors and Pol II CTD kinases
Source: eLife journal article supplement (doi:10.7554/elife.25637), 2017-05-24

**Figure 7\_figure supplement 1**

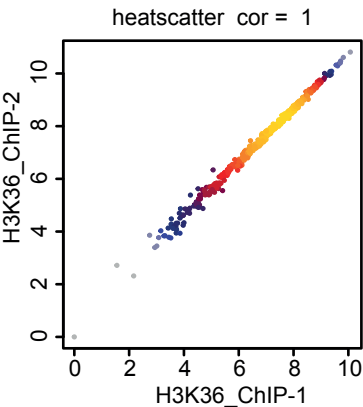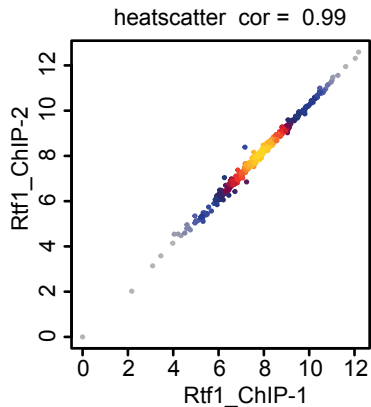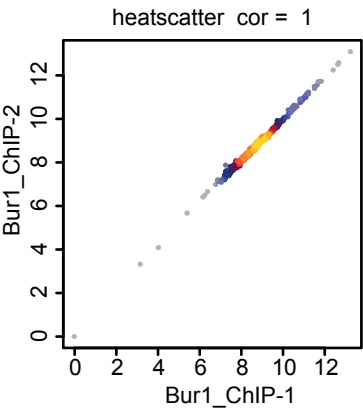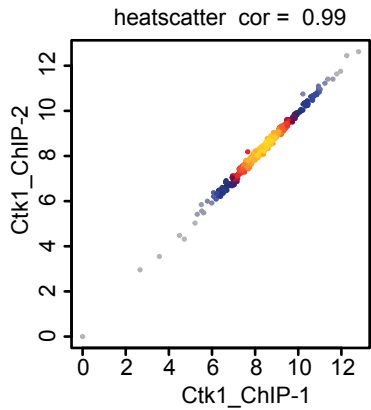

Supplement: supp [file elife-25637-supp-v1.zip]

Figure 2\_figure supplement 1

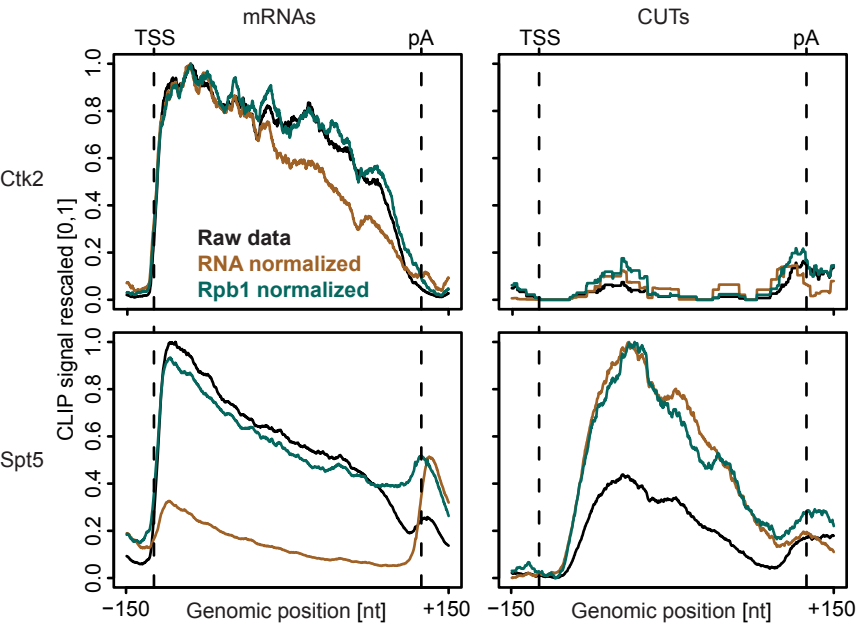

Supplement: supp [file elife-25637-supp-v1.zip]

**Figure 1\_supplement 1**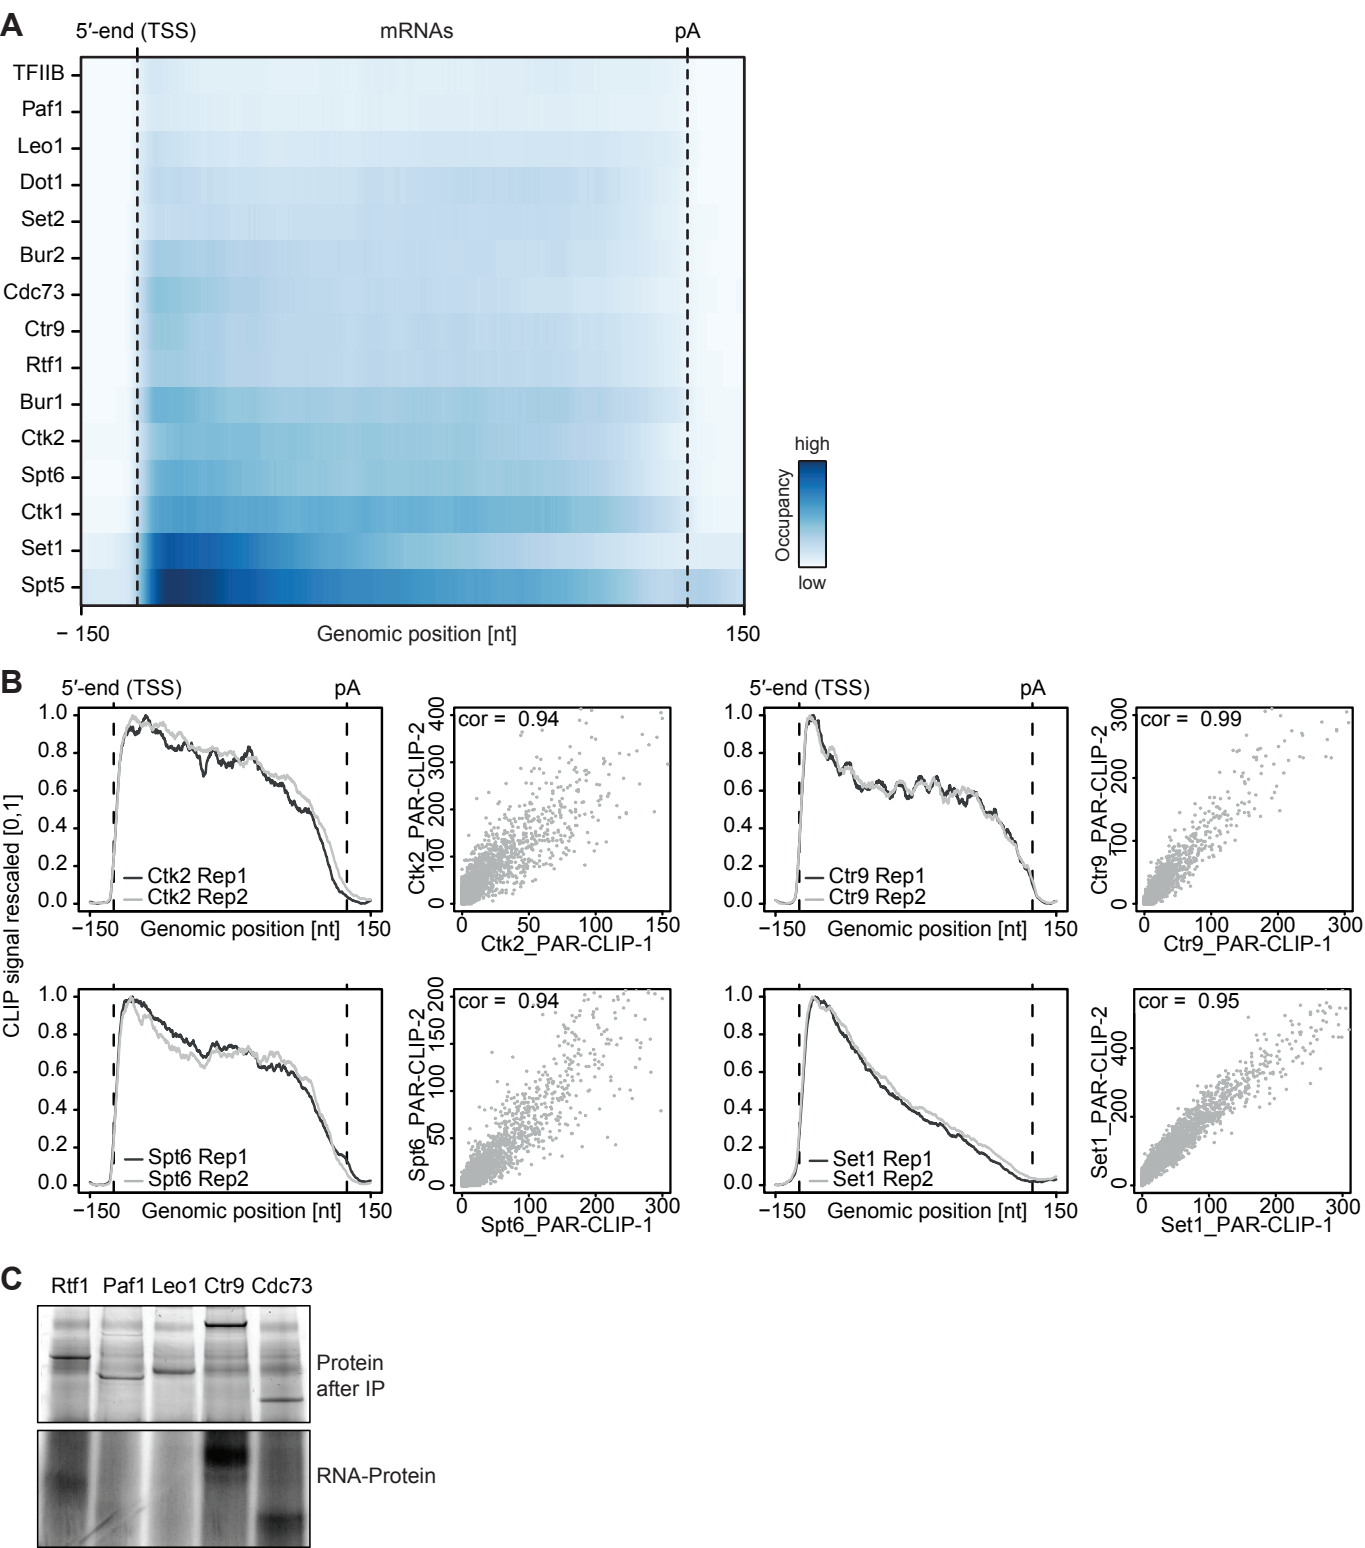

Supplement: supp [file elife-25637-supp-v1.zip]

**Figure 3\_figure supplement 1**

**A**

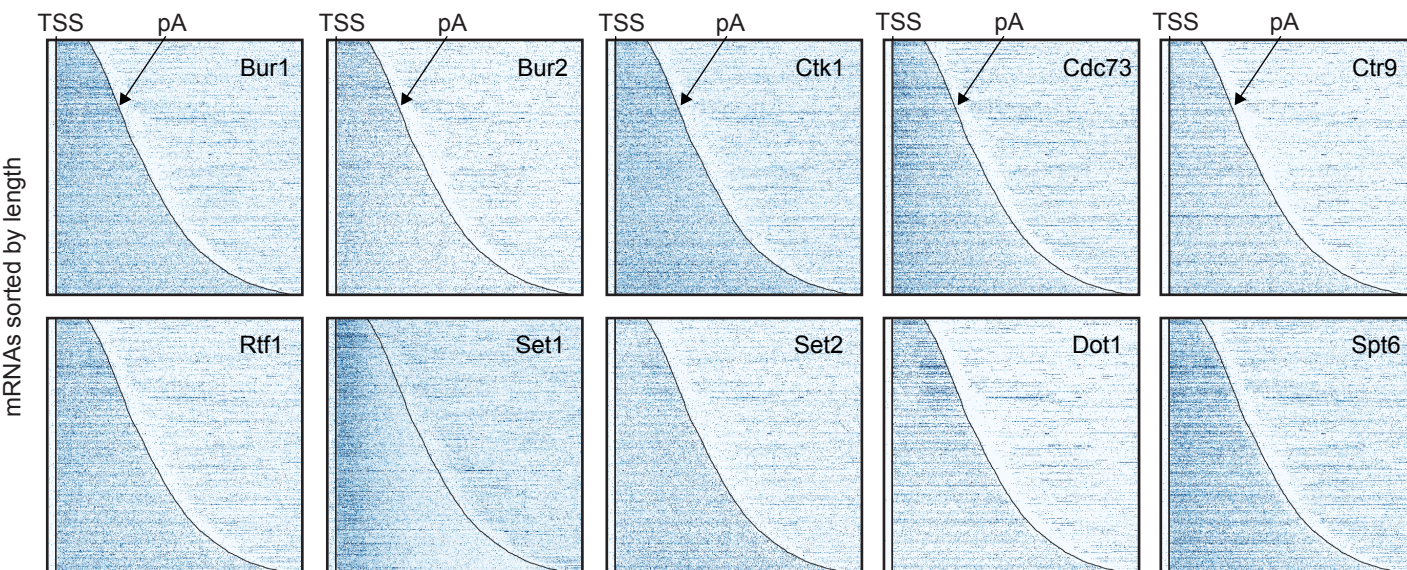

**B**

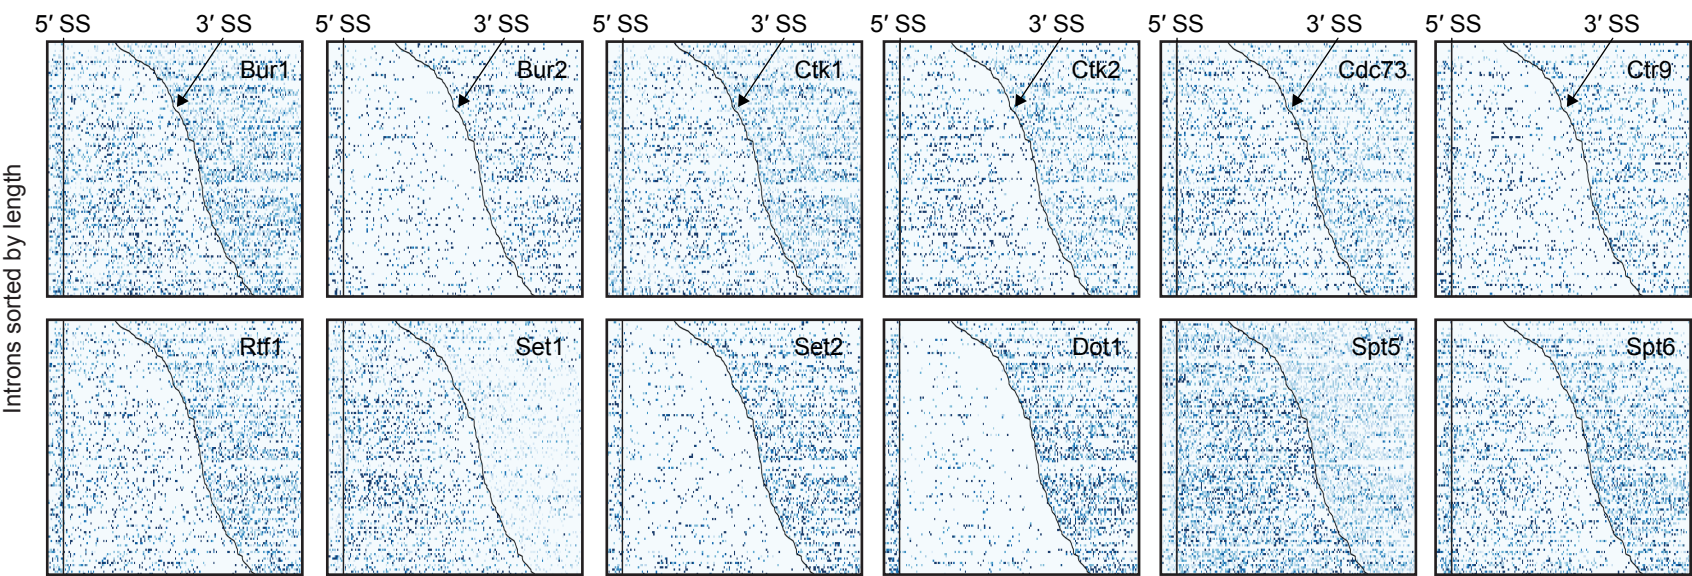

Supplement: supp [file elife-25637-supp-v1.zip]

**Figure 6E\_figure supplement 1**

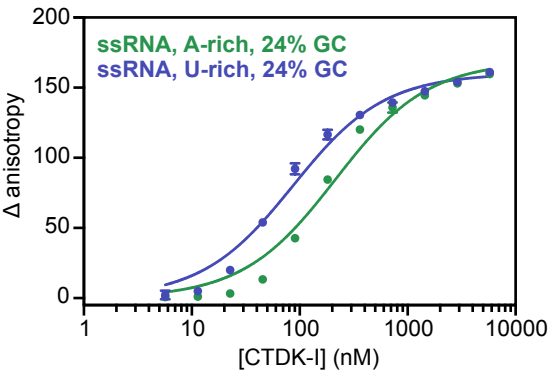

Supplement: supp [file elife-25637-supp-v1.zip]

**Figure 4\_figure supplement 1**

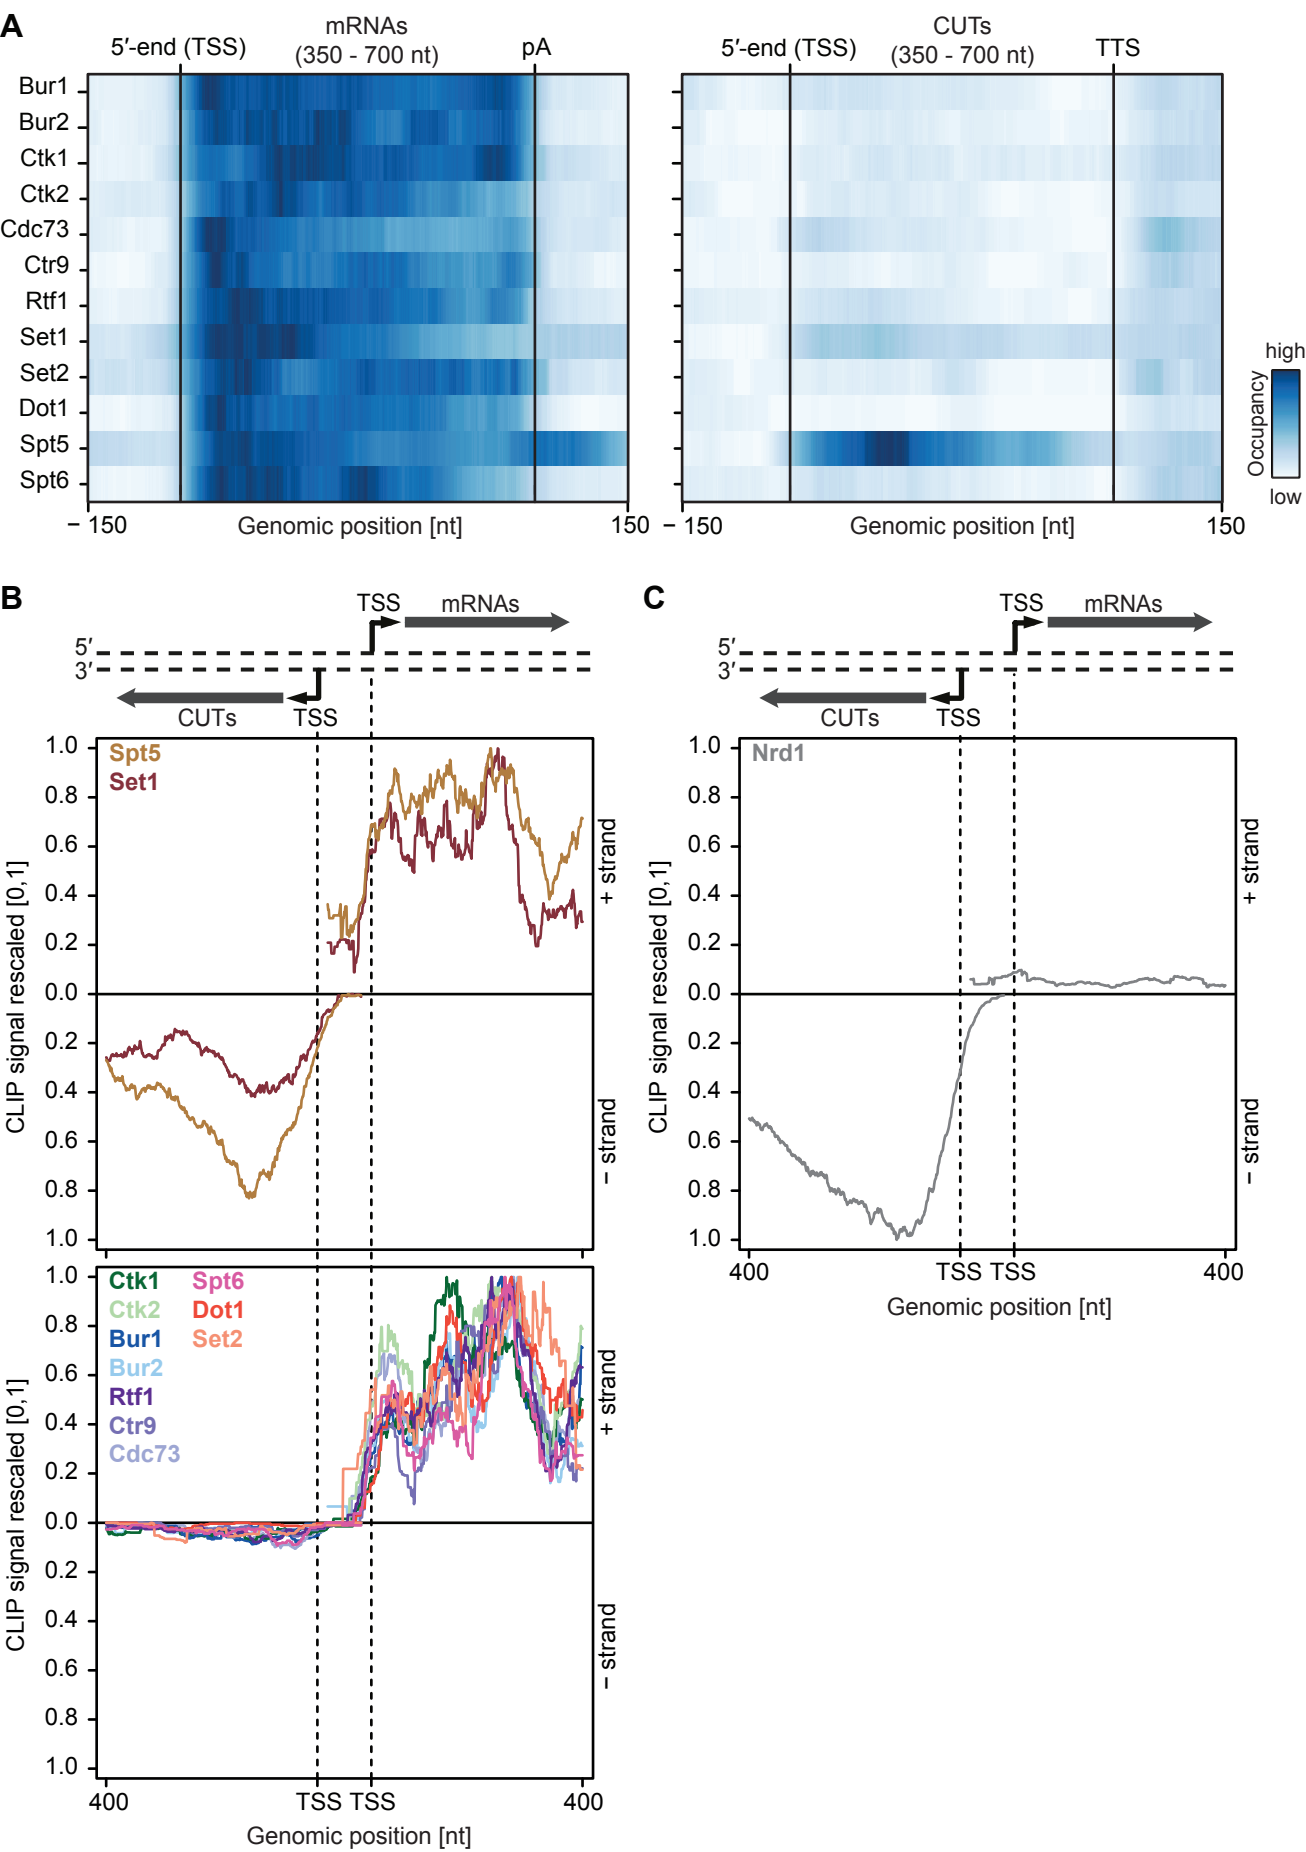

Supplement: supp [file elife-25637-supp-v1.zip]
